# Supplementary material for: Completely integrated wirelessly-powered photocatalyst-coated spheres as a novel means to perform heterogeneous photocatalytic reactions
Source: Royal Society of Chemistry journal article supplement (doi:10.1039/c7cy01537b), 2017-01-01
Supplement: c7cy01537b1.pdf [file c7cy01537b1.pdf]

Supplementary Material (ESI) for  
Catalysis Science & Technology  
This journal is © The Royal Society of Chemistry 2017

## Supporting Information

### **Completely Integrated Wirelessly-Powered Photocatalyst Spheres as a Novel Means to Perform Heterogeneous Photocatalytic Reactions**

B. O. Burek,<sup>a</sup> A. Sutor,<sup>b</sup> D. W. Bahnemann,<sup>c</sup> J. Z. Bloh\*<sup>a</sup>

- 
- a B.O. Burek, Dr. J.Z. Bloh  
DECHEMA-Forschungsinstitut  
Theodor-Heuss-Allee 25, 60486 Frankfurt am Main, Germany  
E-mail: bloh@dechema.de  
Homepage: <http://dechema-dfi.de/TC.html>
- b Dr. A. Sutor  
Department of Sensor Technology  
University of Erlangen-Nuremberg  
91052 Erlangen, Germany
- c Prof. Dr. D.W. Bahnemann  
Institut für Technische Chemie  
Leibniz Universität Hannover  
Callinstrasse 3, 30167 Hannover, Germany

## Table of Contents

1. Results and Discussion
  - 1.1. Characterization of the coated WLE
  - 1.2. Photocatalytic H<sub>2</sub>O<sub>2</sub> production with WLE
  - 1.3. Photocatalytic MB degradation with WLE
  - 1.4. Photocatalytic NB reduction to AN with WLE
  - 1.5. Principal performance figures of the WLE
  - 1.6. Cost evaluation and data of the used WLE
  - 1.7 Power Consumption an CO<sub>2</sub> footprint
2. References
3. Author contributions

## 1. Results and Discussion

### 1.1. Characterization of the coated WLE

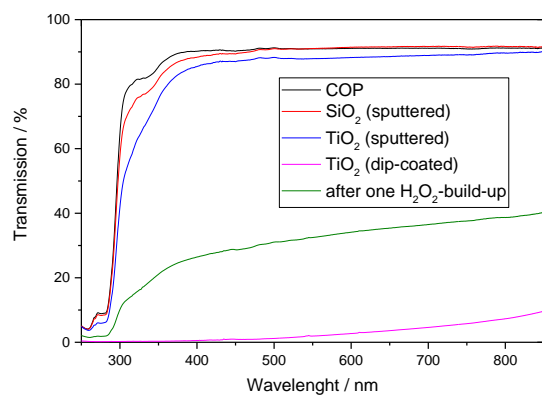

**Figure S1.** Transmission spectra of the individual layers / coating steps.

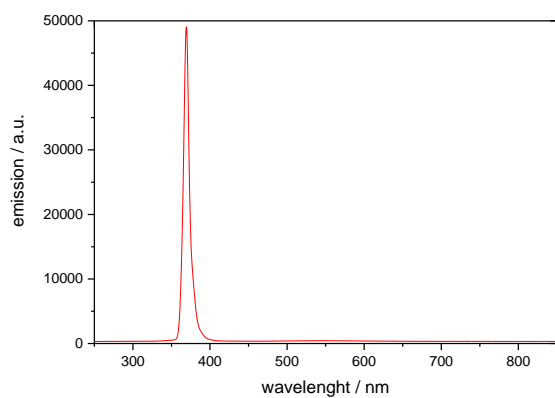

**Figure S2.** Emission spectrum of a SiO<sub>2</sub>-coated WLE.

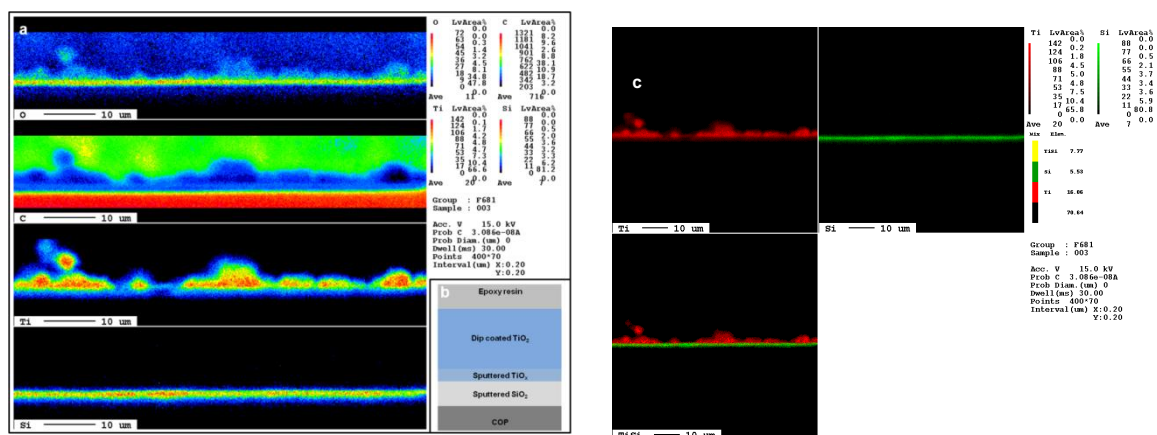

**Figure S3.** EPMA/WDS element mapping of a cross section cut of a coated COP sheet (a), schematic view of the mapped layers (b) and mapping pictures with different colours for Ti and Si with an overlay to see the separation of the layers (c).

## 1.2. Photocatalytic H<sub>2</sub>O<sub>2</sub> production with WLE

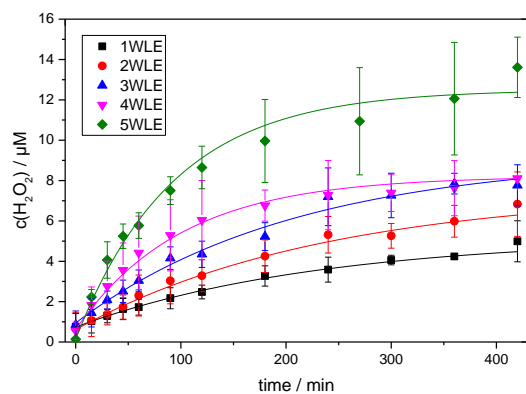

**Figure S4.** Concentration-time-profiles for the photocatalytic H<sub>2</sub>O<sub>2</sub> generation with different numbers of WLE. Reaction conditions were as follows: 1-5 coated WLE, 30 ml 0.1M phosphate buffer, pH = 3, 60 mL min<sup>-1</sup> O<sub>2</sub> bubbling. Solid lines represent a fit using the kinetics described by Kormann *et al.*<sup>1</sup>.

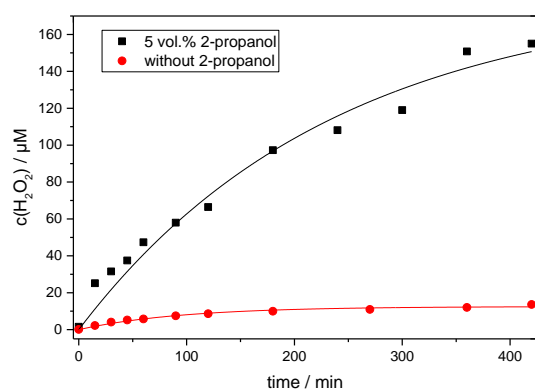

**Figure S5.** Comparison of the concentration-time-profiles of the photocatalytic  $\text{H}_2\text{O}_2$  generation with (black) and without (red) the use of 2-propanol (5. vol. %) as sacrificial electron donor. Reaction conditions were as follows: 5 coated WLE, 30 ml 0.1M phosphate buffer, pH = 3,  $60 \text{ mL min}^{-1}$   $\text{O}_2$  bubbling. Solid lines represent a fit using the kinetics described by Kormann *et al.*<sup>1</sup>.

**Table S1.** Kinetic data for  $\text{H}_2\text{O}_2$  generation reactions.

| n WLE | Photon flux density                  | $k_B$                  | $\xi^1$ | $k_B$ (iPrOH)          | $\xi^1$ | $k_B$ (suspension)     | $\xi^1$ |
|-------|--------------------------------------|------------------------|---------|------------------------|---------|------------------------|---------|
|       | $\mu\text{E L}^{-1} \text{min}^{-1}$ | $\mu\text{M min}^{-1}$ | %       | $\mu\text{M min}^{-1}$ | %       | $\mu\text{M min}^{-1}$ | %       |
| 1     | 47.8182                              | 0.0226                 | 0.0946  |                        |         | 0.0896                 | 0.3748  |
| 2     | 113.9917                             | 0.0314                 | 0.0550  |                        |         |                        |         |
| 3     | 135.2603                             | 0.0440                 | 0.0650  |                        |         |                        |         |
| 4     | 189.0114                             | 0.0817                 | 0.0864  |                        |         |                        |         |
| 5     | 237.2703                             | 0.1349                 | 0.1138  | 0.7695                 | 0.6486  | 0.2042                 | 0.1720  |

<sup>1</sup>assuming two photons are required for each conversion.

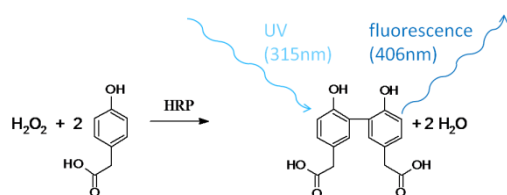

**Scheme S1.** Reaction scheme of HRP catalyzed dimerisation of *p*-hydroxyphenylacetic acid as probe reaction for  $\text{H}_2\text{O}_2$  analytics.

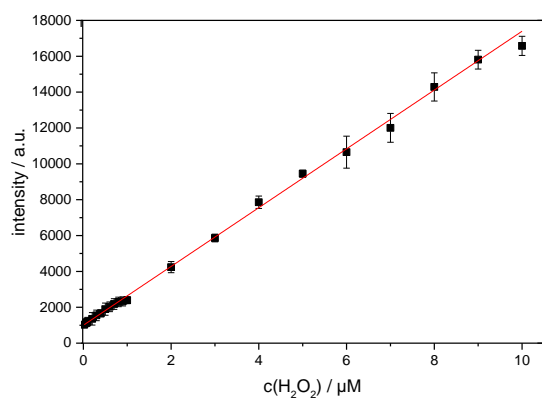

Figure S6. Calibration curve of  $\text{H}_2\text{O}_2$  analytics.

### 1.3. Photocatalytic MB degradation with WLE

Table S2. Kinetic data for MB decolouration reactions.

| n WLE | Photon flux density<br>$\text{nE L}^{-1} \text{min}^{-1}$ | $k_D$<br>$\text{nM min}^{-1}$ | $\xi$<br>% |
|-------|-----------------------------------------------------------|-------------------------------|------------|
| 1     | 47818.2                                                   | 8.5                           | 0.0178     |
| 2     | 113991.7                                                  | 17.7                          | 0.0155     |
| 3     | 135260.3                                                  | 22.6                          | 0.0167     |
| 4     | 189011.4                                                  | 25.9                          | 0.0137     |
| 5     | 237270.3                                                  | 29.9                          | 0.0126     |

### 1.4. Photocatalytic NB reduction to AN with WLE

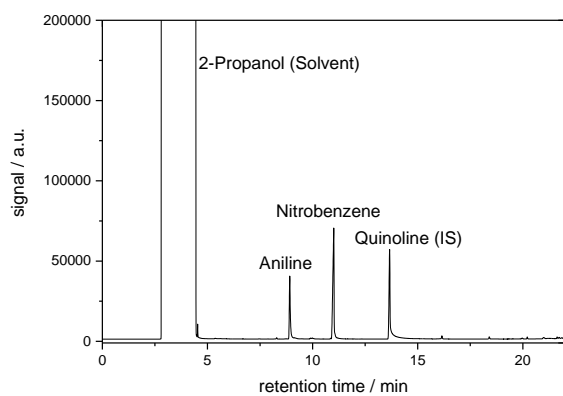

Figure S7. Exemplary GC spectrum after 5 h reaction time.

**Table S3.** Kinetic data for NB reduction.

| n WLE | Photon flux density<br>mE L <sup>-1</sup> h <sup>-1</sup> | k <sub>B</sub> (AN)<br>mM min <sup>-1</sup> | ξ <sub>AN</sub> <sup>1</sup><br>% |
|-------|-----------------------------------------------------------|---------------------------------------------|-----------------------------------|
| 5     | 14.2362                                                   | 0.94                                        | 26                                |

<sup>1</sup>assuming six photons for each conversion

## 1.5. Principal performance figures of the WLE

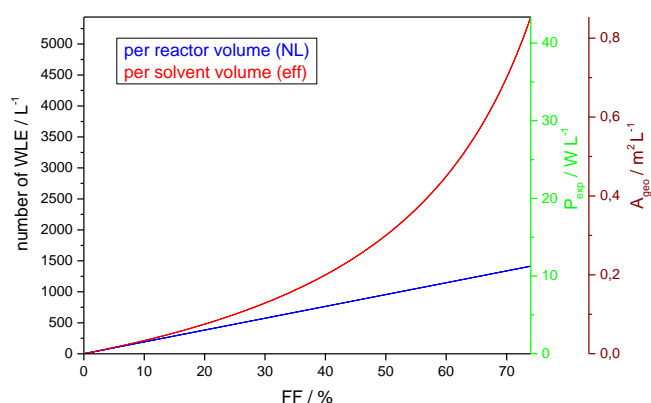

**Figure S8.** Principal performance figures of the WLE system in dependence of different densities of WLE / fill factors.

Calculation of the performance figures using volume of each WLE  $V_{WLE} = 0.52$  mL, specific radiant power of each WLE  $P_{exp} = 0.08$  W WLE<sup>-1</sup>, specific surface area of each WLE (only counting the top half which is internally illuminated)  $A_{1/2WLE} = 1.57$  cm<sup>2</sup>:

Number of WLE per reactor volume  $n_{WLE}$  (NL):

$$n_{WLE}(NL) = \frac{FF \times V}{V_{WLE}}$$

Number of WLE per effective reaction medium volume  $n_{WLE}$  (eff):

$$n_{WLE}(eff) = n_{WLE}(NL) \times \frac{1}{(1 - FF)}$$

Total radiant flux density per reactor volume  $P_{exp}$  (NL):

$$P_{exp}(NL) = n_{WLE}(NL) \times P_{WLE}$$

Total radiant flux density per effective reaction medium volume  $P_{exp}$  (eff):

$$P_{exp}(eff) = n_{WLE}(eff) \times P_{WLE}$$

Total photon flux densities were calculated from the radiant flux densities by multiplying them with  $3.05 \mu\text{E J}^{-1}$  which is derived from the factor  $N_A^{-1} \cdot \text{h}^{-1} \cdot \text{c}^{-1} \cdot \lambda$  using the Avogadro constant  $N_A$ , planck constant  $h$ , light speed  $c$  and wavelength of the photons  $\lambda$  (365 nm).

Total geometric catalyst surface per reactor volume  $A_{geo}$  (NL):

$$A_{geo}(NL) = n_{WLE}(NL) \times A_{1/2WLE}$$

Total geometric catalyst surface per effective reaction medium volume  $A_{geo}(eff)$ :

$$A_{geo}(eff) = n_{WLE}(eff) \times A_{\frac{1}{2}WLE}$$

Space time yield STY was calculated by multiplying the photon flux density by  $3600 \text{ s h}^{-1}$ .

## 1.6. Cost evaluation and data of the used WLE

The main part for the cost of the used WLE is the UV-LED, cf. Table S4. A cost reduction and more efficient LEDs are expected soon according to Haitz's law.<sup>2</sup> In comparison to the one year old used LED, already today cheaper and higher powered LEDs are available.<sup>3</sup> For example a 365 nm LED with comparable performance is now available for 3.97 € (also at a quantity of 100).<sup>4</sup> Further cost reductions can be achieved by raising the quantity and therefore lowering the fixed costs for fabrication considerably, at quantities of >1000 units, the fabrication costs drop well below 1 € per unit.

**Table S4.** Cost evaluation of the used WLE with an order quantity of 100 WLE.

| part                                     | Cost / € per WLE |
|------------------------------------------|------------------|
| mounted LED                              | 26.39            |
| fabrication of LED                       | 3.90             |
| COP (polymer shell,<br>0,25 g per shell) | 0.02             |
| fabrication of the shell                 | 1.47             |
| Sum                                      | 31.78            |

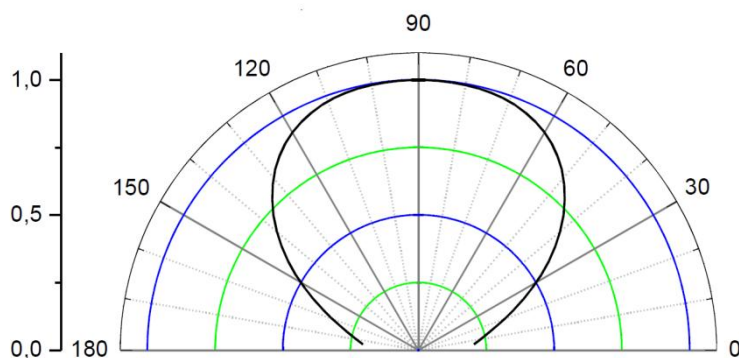

**Figure S9.** View angle of the used LED (taken from the data sheet).

## 1.7. Power consumption and CO<sub>2</sub> footprint

The power consumption was measured as wall-plug-efficiency using a commercial power meter and found to be 8 W, invariant of the number of WLEs used (1 to 5). Using this power consumption, it is possible to calculate the energy consumption and CO<sub>2</sub> footprint of the reactions studied here, cf. Table S5. The table lists also an outlook at the efficiency of the system when it would be optimized to the state-of-the-art RIC and LED efficiencies. Also, the CO<sub>2</sub> footprint could be further lowered by using renewable energy sources. Nevertheless, the photonic efficiency of a reaction limits the overall efficiency of the system. Therefore reactions like H<sub>2</sub>O<sub>2</sub> generation will remain rather inefficient and could be mainly enhanced developing more efficient catalysts.



**Table S5.** Calculation of power consumption and CO<sub>2</sub> footprint for H<sub>2</sub>O<sub>2</sub> generation and NB reduction with 5 WLE.

| Product                                    | Energy consumption /<br>kWh kg <sup>-1</sup> product | CO <sub>2</sub> footprint /<br>kg CO <sub>2</sub> kg <sup>-1</sup> product <sup>d</sup> |
|--------------------------------------------|------------------------------------------------------|-----------------------------------------------------------------------------------------|
| Aniline <sup>a</sup>                       | 10,308                                               | 5,432                                                                                   |
| Aniline <sup>b</sup>                       | 4,569                                                | 2,408                                                                                   |
| Aniline <sup>c</sup>                       | 86                                                   | 45                                                                                      |
| H <sub>2</sub> O <sub>2</sub> <sup>b</sup> | 968,289                                              | 510,288                                                                                 |

<sup>a</sup> calculated with reaction data shown in Fig. 6 after 24 h.

<sup>b</sup> calculated with the respective formation rates.

<sup>c</sup> calculated for an optimized system with the assumption of 75% RIC efficiency and 35% LED efficiency.

<sup>d</sup> calculated with 527 g kWh<sup>-1</sup>; value for the German electricity mix 2016.<sup>5</sup>

## 2. Notes and references

- 1 C. Kormann, D. W. Bahnemann and M. R. Hoffmann, *Environ. Sci. Technol.*, 1988, **22**, 798–806.
- 2 *Nat. Photonics*, 2007, **1**, 23–23.
- 3 M. Sender and D. Ziegenbalg, *Chemie Ing. Tech.*, 2017, 1–16.
- 4 Mouser Electronics, [http://www.mouser.de/Optoelectronics/LED-Lighting/LED-Emitters/High-Power-LEDs-Single-Color/\\_/N-8usfn?P=1yzt848Z1z0z7pt](http://www.mouser.de/Optoelectronics/LED-Lighting/LED-Emitters/High-Power-LEDs-Single-Color/_/N-8usfn?P=1yzt848Z1z0z7pt), 11.07.2017.
- 5 Umweltbundesamt, 2017.

## 3. Author Contributions

B.O.B. and J.Z.B. designed the experiments. B.O.B. carried out the coating procedures, characterisation and photocatalytic experiments. B.O.B. and J.Z.B. analysed the data and co-wrote the manuscript. A.S. designed the WLE's electronic circuit and the field generator for powering them. D.W.B. and J.Z.B. supervised the project. J.Z.B. conceived the concept.
